# Supplementary material for: Optimization of duplex velocity criteria for diagnosis of internal carotid artery (ICA) stenosis: A report of the Intersocietal Accreditation Commission (IAC) Vascular Testing Division Carotid Diagnostic Criteria Committee
Source: PubMed Central journal article supplement — Vasc Med. 2021 May 19;26(5):515–25. doi: 10.1177/1358863X211011253 (PMC8493430; doi:10.1177/1358863x211011253), 2021-05-19
Supplement: sj-pdf-1-vmj-10.1177_1358863X211011253.pdf [file sj-pdf-1-vmj-10.1177_1358863X211011253.pdf]

Supplemental Table 1:  
SRU Carotid Consensus Criteria (SRUCC) for Internal Carotid Artery (ICA) Stenosis

| Degree of Stenosis (%)           | Primary Parameters        |                              | Additional Parameters |                  |
|----------------------------------|---------------------------|------------------------------|-----------------------|------------------|
|                                  | ICA PSV (cm/sec)          | Plaque Estimate (%)*         | ICA/CCA PSV Ratio     | ICA EDV (cm/sec) |
| Normal                           | <125                      | None                         | <2.0                  | <40              |
| <50                              | <125                      | <50                          | <2.0                  | <40              |
| 50-69                            | 125-230                   | ≥50                          | 2.0-4.0               | 40-100           |
| ≥70 but less than near occlusion | >230                      | ≥50                          | >4.0                  | >100             |
| Near occlusion                   | High, low or undetectable | Visible                      | Variable              | Variable         |
| Total occlusion                  | Undetectable              | Visible, no detectable lumen | Not applicable        | Not applicable   |

Reproduced with permission from Grant EG, Benson CB, Moneta GL, Alexandrov AV, Baker JD, Bluth EI, et al. Carotid artery stenosis: grayscale and Doppler US diagnosis – Society of Radiologists in Ultrasound Consensus Conference. *Radiology* 2003. 229:340-6.

ICA, internal carotid artery; CCA, common carotid artery; PSV, peak-systolic velocity; EDV, end-diastolic velocity.

Supplemental Table 2

Summary statistics of duplex ultrasound velocity parameters\*

| <b>Parameter</b>                     | <b>N</b> | <b>Mean</b> | <b>Std Dev</b> | <b>Median</b> | <b>Minimum</b> | <b>Maximum</b> |
|--------------------------------------|----------|-------------|----------------|---------------|----------------|----------------|
| <b>Common carotid artery (CCA)</b>   |          |             |                |               |                |                |
| Prox CCA PSV (cm/sec)                | 287      | 99.5        | 27.2           | 95.6          | 36.7           | 225.4          |
| Mid CCA PSV (cm/sec)                 | 252      | 89.6        | 25.3           | 85.7          | 45.8           | 213.0          |
| Dist CCA PSV (cm/sec)                | 283      | 83.0        | 25.1           | 81.1          | 32.5           | 217.0          |
| <b>Internal carotid artery (ICA)</b> |          |             |                |               |                |                |
| Prox ICA PSV (cm/sec)                | 289      | 180.9       | 135.7          | 131.0         | 32.8           | 697.0          |
| Prox ICA EDV (cm/sec)                | 289      | 54.7        | 50.7           | 34.6          | 6.6            | 304.0          |
| Mid ICA PSV (cm/sec)                 | 258      | 128.3       | 76.4           | 104.0         | 32.8           | 484.0          |
| Mid ICA EDV (cm/sec)                 | 257      | 37.1        | 26.6           | 30.1          | 10.1           | 290.0          |
| Distal ICA PSV (cm/sec)              | 283      | 96.0        | 43.9           | 85.0          | 8.4            | 310.0          |
| Distal ICA EDV (cm/sec)              | 283      | 29.0        | 13.2           | 25.9          | 5.3            | 87.7           |
| <b>Max† (Prox/Mid) ICA PSV</b>       | 290      | 193.6       | 137.0          | 141.0         | 32.8           | 697.0          |
| <b>Max† (Prox/Mid) ICA EDV</b>       | 289      | 59.3        | 51.6           | 39.3          | 8.4            | 304.0          |
| <b>ICA/CCA PSV ratio</b>             | 283      | 2.6         | 2.2            | 1.6           | 0.51           | 13.5           |

CCA, common carotid artery; ICA, internal carotid artery; PSV, peak systolic velocity; EDV, end diastolic velocity; cm/sec, centimeters/second.

\*N=9 sides with near-total/total ICA occlusion excluded.

†Defined as highest recorded velocity in the proximal or mid ICA segment.

ICA, internal carotid artery; CCA, common carotid artery; PSV, peak-systolic velocity; EDV, end-diastolic velocity; prox, proximal; max, maximum.

Supplemental Table 3:

Distribution of category of ICA stenosis as determined by physician ultrasound interpretation using SRUCC and catheter angiography (NASCET). N=299 ICA sides.

| <b>Stenosis Category</b>                          | <b>Angiogram<br/>(<u>NASCET</u>)</b> | <b>Ultrasound Review<br/>(<u>SRUCC</u>)</b> |
|---------------------------------------------------|--------------------------------------|---------------------------------------------|
| <50%                                              | 201 (67.2%)                          | 130 (43.5%)*                                |
| 50-69%                                            | 56 (18.7%)                           | 87 (29.1%)                                  |
| ≥70% but less than near-<br>total/total occlusion | 33 (11.0%)†                          | 73 (24.4%)                                  |
| Near- total occlusion                             | 3 (1.0%)                             | 4 (1.3%)                                    |
| Total occlusion                                   | 6 (2.0%)                             | 5 (1.7%)                                    |

\*Normal and plaque with < 50% stenosis by ultrasound defined as < 50% stenosis

†13/33 ICA lesions with ≥ 80% ICA stenosis in the ≥ 70% category

NASCET, North American Symptomatic Carotid Endarterectomy Trial; SRUCC, Society of Radiologists in Ultrasound Consensus; ICA, internal carotid artery.

Supplemental Table 4: Area under curve for ROC analysis of duplex ultrasound velocity parameters for prediction of  $\geq 50\%$  and  $\geq 70\%$  ICA stenosis by catheter angiography (NASCET): stratified analyses by contralateral occlusion, patient sex, right/left sides, hemispheric symptoms\*

ICA side contralateral to near-total/total occlusions removed

|                    | All<br>Angio<br>$\geq 50\%$ vs<br>$< 50\%$ | Removed<br>Angio<br>$\geq 50\%$ vs<br>$< 50\%$ | All<br>Angio<br>$\geq 70\%$ vs<br>$< 70\%$ | Removed<br>Angio<br>$\geq 70\%$ vs<br>$< 70\%$ |
|--------------------|--------------------------------------------|------------------------------------------------|--------------------------------------------|------------------------------------------------|
| Max ICA PSV        | 0.94                                       | 0.94                                           | 0.91                                       | 0.91                                           |
| Max ICA EDV        | 0.93                                       | 0.93                                           | 0.91                                       | 0.91                                           |
| ICA/CCA PSV ratio† | 0.96                                       | 0.96                                           | 0.90                                       | 0.90                                           |
| PSV + ratio        | 0.96                                       | 0.95                                           | 0.91                                       | 0.91                                           |
| PSV + EDV          | 0.94                                       | 0.94                                           | 0.91                                       | 0.91                                           |
| PSV + EDV + ratio  | 0.96                                       | 0.96                                           | 0.91                                       | 0.92                                           |

Patient sex

|                   | All<br>Angio<br>$\geq 50\%$ vs<br>$< 50\%$ | Male<br>Angio<br>$\geq 50\%$ vs<br>$< 50\%$ | Female<br>Angio<br>$\geq 50\%$ vs<br>$< 50\%$ | All<br>Angio<br>$\geq 70\%$ vs<br>$< 70\%$ | Male<br>Angio<br>$\geq 70\%$ vs<br>$< 70\%$ | Female<br>Angio<br>$\geq 70\%$ vs<br>$< 70\%$ |
|-------------------|--------------------------------------------|---------------------------------------------|-----------------------------------------------|--------------------------------------------|---------------------------------------------|-----------------------------------------------|
| Max ICA PSV       | 0.94                                       | 0.94                                        | 0.93                                          | 0.91                                       | 0.88                                        | 0.98                                          |
| Max ICA EDV       | 0.93                                       | 0.94                                        | 0.91                                          | 0.91                                       | 0.90                                        | 0.94                                          |
| ICA/CCA PSV ratio | 0.96                                       | 0.96                                        | 0.96                                          | 0.90                                       | 0.88                                        | 0.97                                          |
| PSV + ratio       | 0.96                                       | 0.95                                        | 0.96                                          | 0.91                                       | 0.89                                        | 0.99                                          |
| PSV + EDV         | 0.94                                       | 0.95                                        | 0.93                                          | 0.91                                       | 0.89                                        | 0.97                                          |
| PSV + EDV + ratio | 0.96                                       | 0.96                                        | 0.96                                          | 0.91                                       | 0.90                                        | 0.99                                          |

By ICA side

|                   | All<br>Angio<br>$\geq 50\%$ vs<br>$< 50\%$ | Right<br>Angio<br>$\geq 50\%$ vs<br>$< 50\%$ | Left<br>Angio<br>$\geq 50\%$ vs<br>$< 50\%$ | All<br>Angio<br>$\geq 70\%$ vs<br>$< 70\%$ | Right<br>Angio<br>$\geq 70\%$ vs<br>$< 70\%$ | Left<br>Angio<br>$\geq 70\%$ vs<br>$< 70\%$ |
|-------------------|--------------------------------------------|----------------------------------------------|---------------------------------------------|--------------------------------------------|----------------------------------------------|---------------------------------------------|
| Max ICA PSV       | 0.94                                       | 0.97                                         | 0.90                                        | 0.91                                       | 0.94                                         | 0.87                                        |
| Max ICA EDV       | 0.93                                       | 0.96                                         | 0.89                                        | 0.91                                       | 0.94                                         | 0.88                                        |
| ICA/CCA PSV ratio | 0.96                                       | 0.98                                         | 0.94                                        | 0.90                                       | 0.94                                         | 0.87                                        |
| PSV + ratio       | 0.96                                       | 0.97                                         | 0.90                                        | 0.91                                       | 0.94                                         | 0.88                                        |
| PSV + EDV         | 0.94                                       | 0.98                                         | 0.90                                        | 0.91                                       | 0.93                                         | 0.89                                        |
| PSV + EDV + ratio | 0.96                                       | 0.98                                         | 0.94                                        | 0.91                                       | 0.94                                         | 0.89                                        |

By study indication hemispheric neurological symptoms (Yes/No)

|                   | All<br>Angio<br>$\geq 50\%$ vs<br>$< 50\%$ | Yes<br>Angio<br>$\geq 50\%$ vs<br>$< 50\%$ | No<br>Angio<br>$\geq 50\%$ vs<br>$< 50\%$ | All<br>Angio<br>$\geq 70\%$ vs<br>$< 70\%$ | Yes<br>Angio<br>$\geq 70\%$ vs<br>$< 70\%$ | No<br>Angio<br>$\geq 70\%$ vs<br>$< 70\%$ |
|-------------------|--------------------------------------------|--------------------------------------------|-------------------------------------------|--------------------------------------------|--------------------------------------------|-------------------------------------------|
| Max ICA PSV       | 0.94                                       | 0.95                                       | 0.92                                      | 0.91                                       | 0.96                                       | 0.87                                      |
| Max ICA EDV       | 0.93                                       | 0.95                                       | 0.91                                      | 0.91                                       | 0.98                                       | 0.86                                      |
| ICA/CCA PSV ratio | 0.96                                       | 0.96                                       | 0.95                                      | 0.90                                       | 0.94                                       | 0.86                                      |
| PSV + ratio       | 0.96                                       | 0.95                                       | 0.95                                      | 0.91                                       | 0.96                                       | 0.88                                      |
| PSV + EDV         | 0.94                                       | 0.95                                       | 0.92                                      | 0.91                                       | 0.98                                       | 0.88                                      |
| PSV + EDV + ratio | 0.96                                       | 0.96                                       | 0.96                                      | 0.91                                       | 0.97                                       | 0.88                                      |

\*N=9 sides with near-total/total ICA occlusion excluded; †Ratio = ICA/CCA PSV ratio

NASCET, North American Symptomatic Carotid Endarterectomy Trial; of Radiologists in Ultrasound Consensus; ICA, internal carotid artery; CCA, common carotid artery; PSV, peak-systolic velocity; EDV, end-diastolic velocity.

Supplemental Figure 1:

Methods for measurement of carotid angiograms. This study was conducted using the NASCET method for measurement of ICA stenosis with a normal segment of the ICA distal to the lesion used as the reference lumen diameter<sup>18</sup>. For the ECST method, the lumen diameter is estimated at the site of the ICA stenosis in the proximal segment<sup>23, 24</sup>. It has been shown that percentage ICA stenosis is higher when measured by ECST compared with NASCET methodology<sup>24</sup>. Figure reproduced with permission from Oates CP, Naylor AR, Hartshorne T, Charles SM, Fail T, Humphries K, Aslam M and Khodabakhsh P. Joint recommendations for reporting carotid ultrasound investigations in the United Kingdom. *Eur J Vasc Endovasc Surg.* 2009;37:251-61.

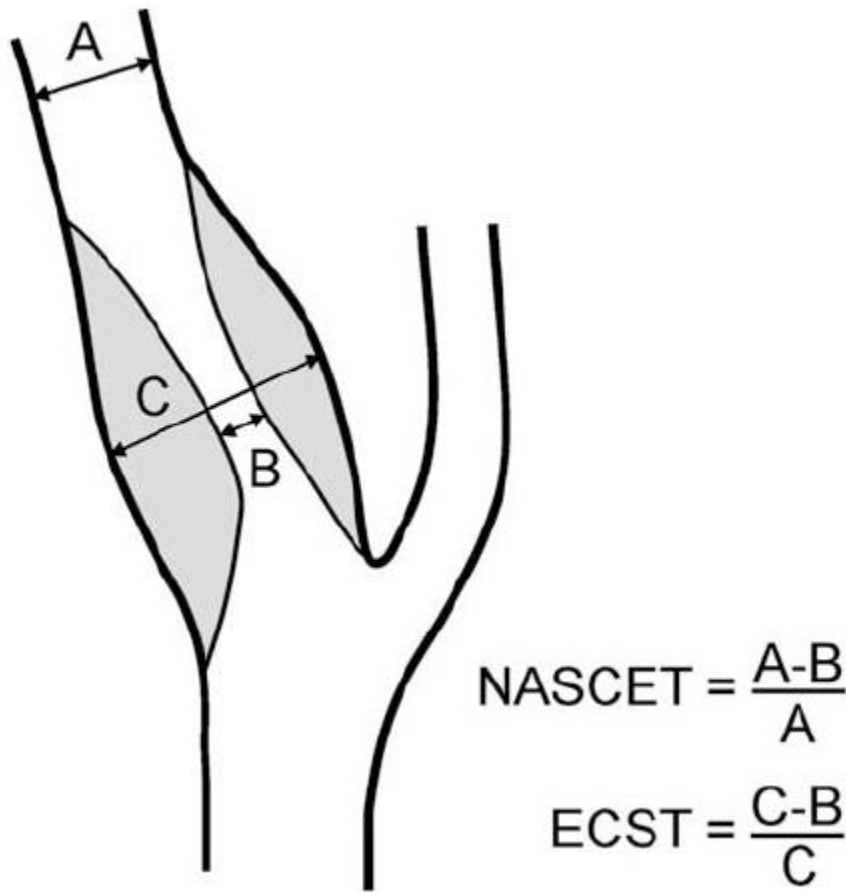

NASCET, North American Symptomatic Carotid Endarterectomy Trial; ECST, European Carotid Surgery Trial.
